# Supplementary material for: The role of attractive and repellent scene memories in ant homing (Myrmecia croslandi)
Source: Oxford University Press journal article supplement (doi:10.1242/jeb.210021), 2019-01-01
Supplement: jeb210021supp.pdf [file jeb210021supp.pdf]

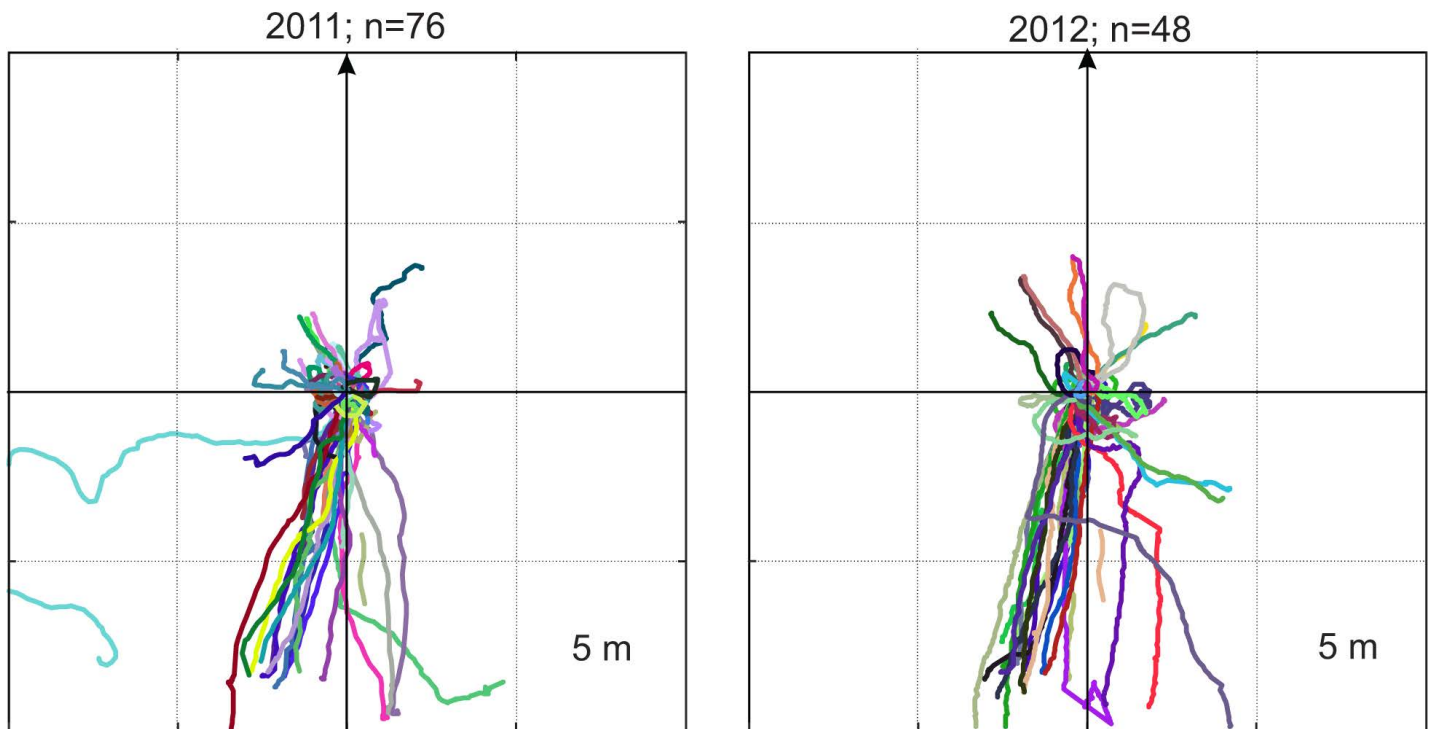

**Figure S1. Foraging patterns at the *M. croslandi* nest used in this study.** Panels show the individual paths of foragers as they have been recorded with differential GPS over a period of two years. These paths provided the original data for the 2D histogram shown in the middle panel of Fig. 1B.

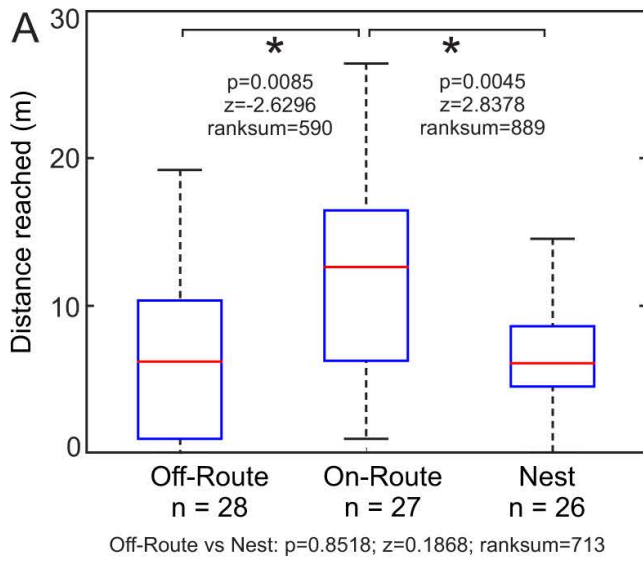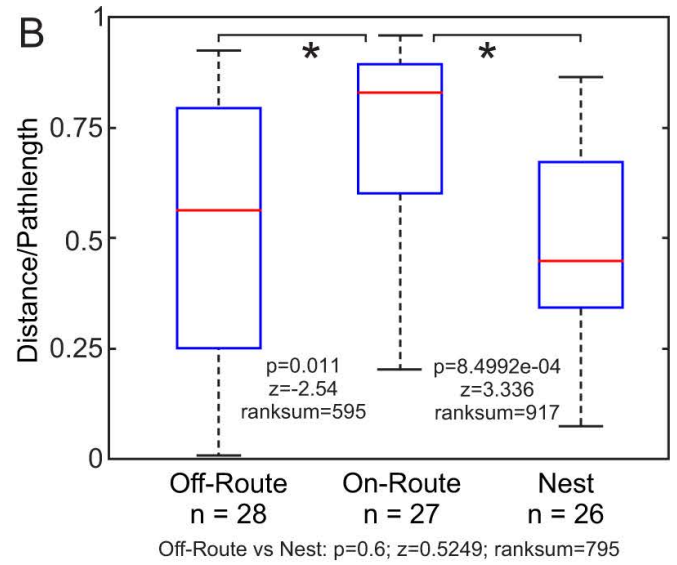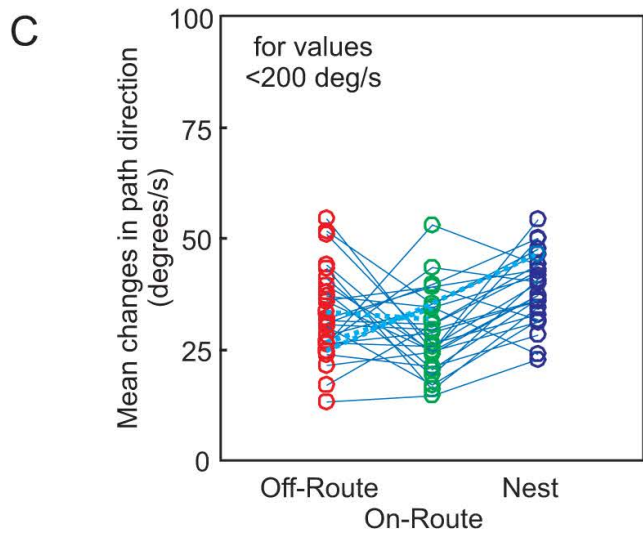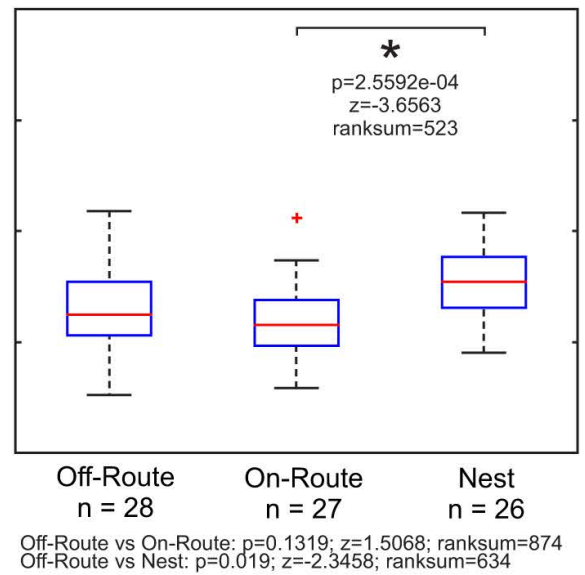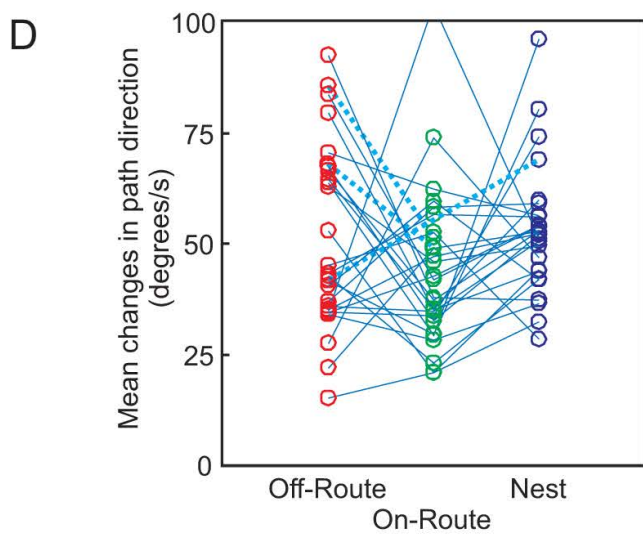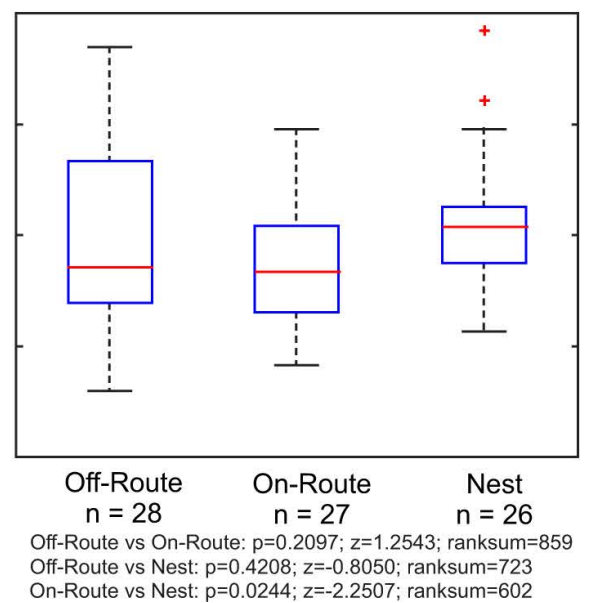

**Figure S2. Quantitative analysis of behavioural differences between Off-route, On-route and Nest locations.** (A) Box plots of distances reached after 5 minutes at the three locations. Significant comparisons with a Wilcoxon Rank Sum test ( $p < 0.0167$ ) are marked by a star and values are shown inside the panel. Values for non-significant comparisons ( $p > 0.0167$ ) are shown below the panel. (B) Box plots of distance over path length ratios after 5 minutes at the three locations. Otherwise conventions as in (A). (C) Left panel: Individual means of the changes in path direction (absolute values  $< 200^\circ/s$ , determined at 11fps) for the first 5 minutes with means of individual ants connected by blue lines. Dashed lines mark cases where an ant was released at two locations only. Right panel: Boxplots of mean changes in path direction with significant differences as determined by Wilcoxon Rank Sum test marked by a star and values shown as inset. Values for non-significant comparisons are shown below the panel. (D) Same for the means and distributions of all absolute values of changes in path direction. Otherwise conventions as before.

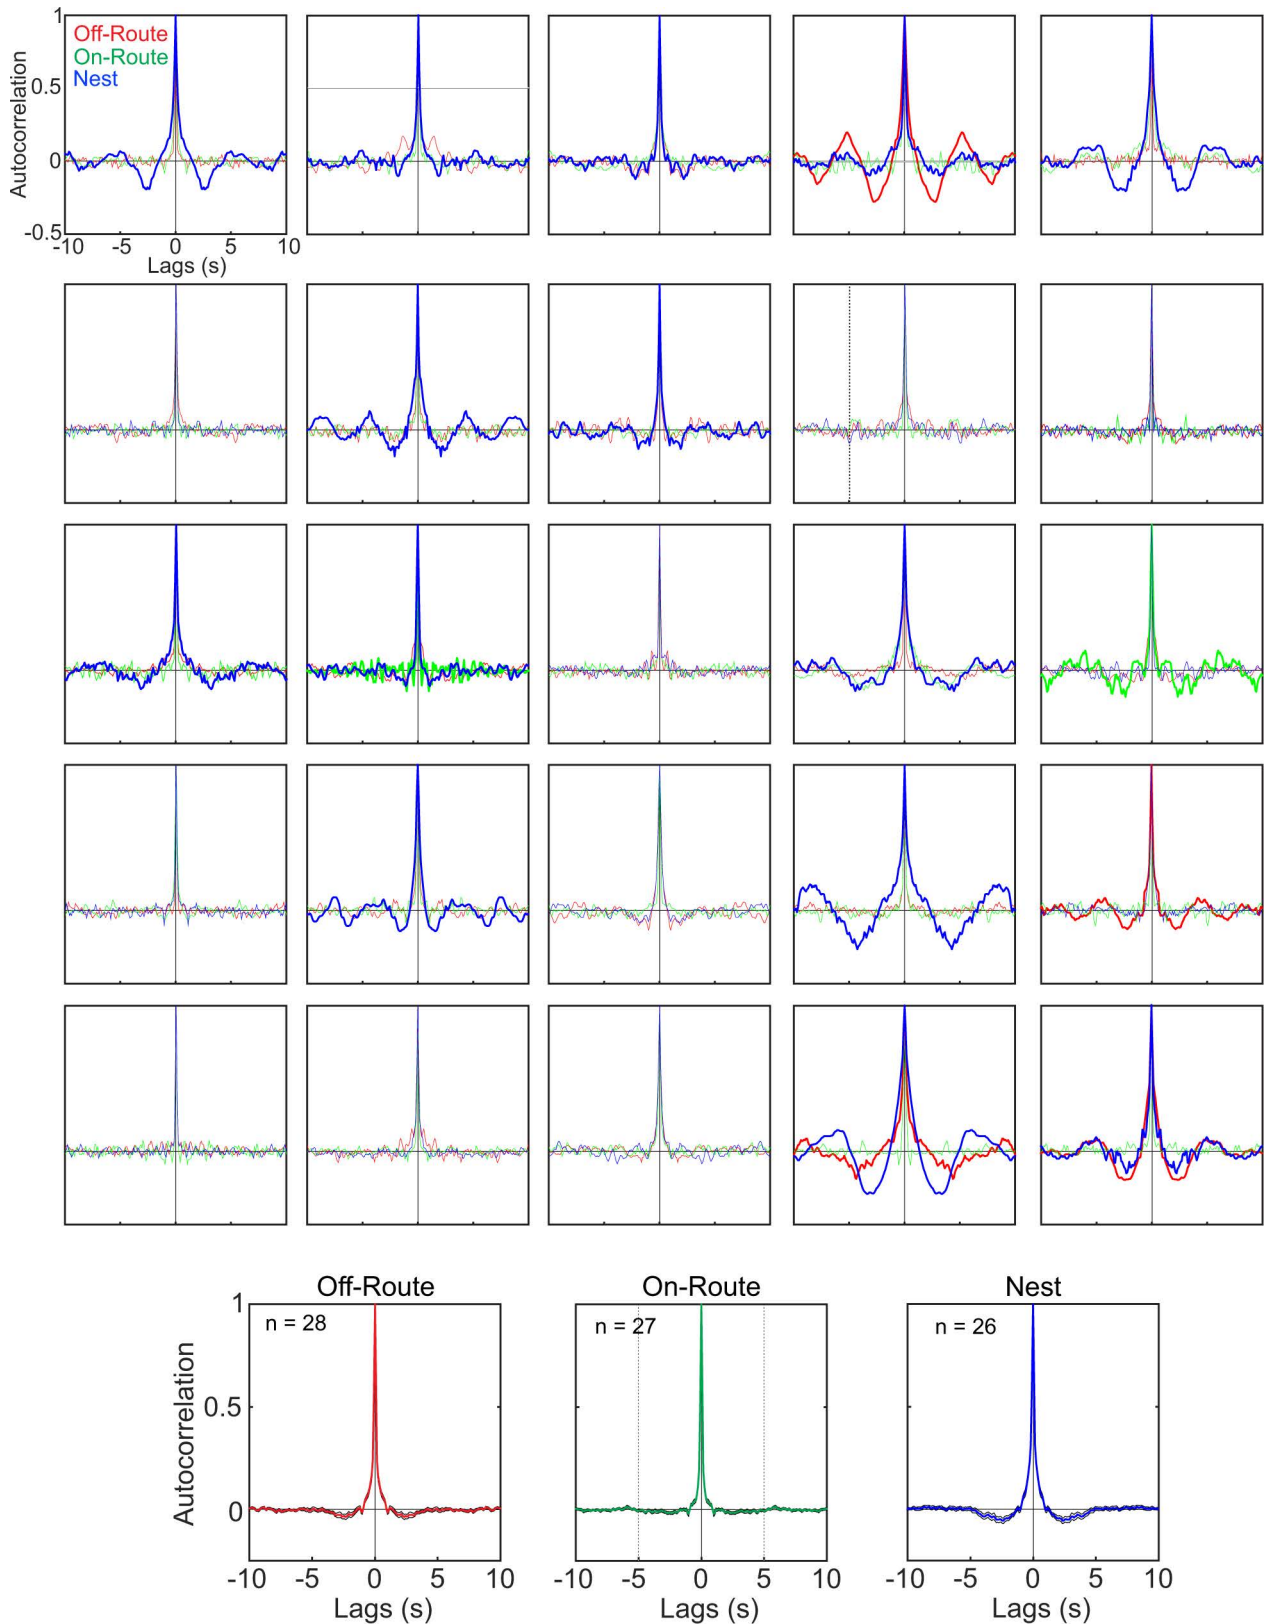

**Figure S3. Comparison of auto-correlation functions of 5 minute time series of changes in path direction at the three locations.** Off-route: red; On-route: green; Nest: blue for each of 25 ants that were tested at all three locations. Bottom panels show mean auto-correlations for all ants at the three locations.
